# Supplementary material for: Efficient intervention for pulmonary fibrosis via mitochondrial transfer promoted by mitochondrial biogenesis
Source: PubMed Central journal article supplement (PMC10507082; doi:10.1038/s41467-023-41529-7), 2023-09-18
Supplement: 41467_2023_41529_MOESM1_ESM.pdf [file 41467_2023_41529_MOESM1_ESM.pdf]

# Efficient intervention for pulmonary fibrosis via mitochondrial transfer promoted by mitochondrial biogenesis

## Table of Contents

- Supplementary Fig. S1. Optimisation of using the treatment with Pg to increase the mitochondrial mass in hMSC.
- Supplementary Fig. S2. Impacts of the treatment with Pg on mitochondrial transfer rate.
- Supplementary Fig. S3. Both the expression levels of PGC-1 $\alpha$  and Cx43 determine the efficiency of mitochondrial transfer rate.
- Supplementary Fig. S4. TEM images of incorporated mitochondria in an annular gap junction.
- Supplementary Fig. S5. Impacts of the engineering with Pg and IONPs on multiple differentiation potentials of hMSC.
- Supplementary Fig. S6. Dynamic observations of the mitochondrial transfer process with hMSC.
- Supplementary Fig. S7. Dynamic observations of the mitochondrial transfer process with Pg-Fe-hMSC.
- Supplementary Fig. S8. Enlarged images of the above dynamic transfer process of mitochondria 2.5 h after the co-incubation.
- Supplementary Fig. S9. Intercellular mitochondrial transfer from hMSCs to different receiving cells.
- Supplementary Fig. S10. Limited mitochondrial transfer rate between healthy cells.
- Supplementary Fig. S11. Mitochondrial transfer rates of different engineered hMSCs.
- Supplementary Fig. S12. Gating strategy by flow cytometers for quantitative determinations of mitochondrial transfer rates.
- Supplementary Fig. 13. Observations of long-term mitochondrial transfer from different engineered hMSCs to BLM-TC-1 cells.
- Supplementary Fig. 14. Direct treatment of TC-1 cells with Pg has poor protection against the injury caused by BLM.
- Supplementary Fig. S15. Cell number ratios impact the mitochondrial transfer rates and associated therapeutic effects.
- Supplementary Fig. S16. The severity of injury of receiving cell affects the intercellular mitochondrial transfer capacity.

Supplementary Fig. S17. Pg-Fe-hMSC demonstrates a more powerful therapeutic effect on TC-1 cell with more severe injury.

Supplementary Fig. S18. Morphological observation of mitochondria in mice lung cells after the indicated treatments using TEM.

Supplementary Fig. S19. H&E staining of major organs in C57BL/6 mice with and without Pg-Fe-hMSC treatment.

Supplementary Fig. S20. Preliminary safety evaluations on the treatment using Pg-Fe-hMSC.

Supplementary Fig. S21. Cell viability of primary human lung epithelial cells after the treatment with BLM at different concentrations.

Supplementary Fig. S22. Cell viability and TGF- $\beta$  expression levels of 3D multicellular humanised lung model post the treatment with BLM at different concentrations.

Supplementary Fig. S23. Confirmation of the fibrotic 3D multicellular humanised lung model.

Supplementary Fig. S24. Distribution of Pg-Fe-hMSC in the fibrotic 3D multicellular humanised lung spheroid.

Supplementary Fig. S25. Observation of the co-localisation of mitochondria and lysosomes.

Supplementary Fig. S26. Pg-Fe-hMSC promotes the autophagy of BLM-TC-1 cell.

Supplementary Table S1. STR authentication of human umbilical vein endothelial cells (HUVEC)

Supplementary Table S2. STR authentication of BEAS-2B cells

Supplementary Table S3. STR authentication of Hs888Lu cells

Supplementary Table S4. Primer sequences for PCR

Supplementary Table S5. Antibody information

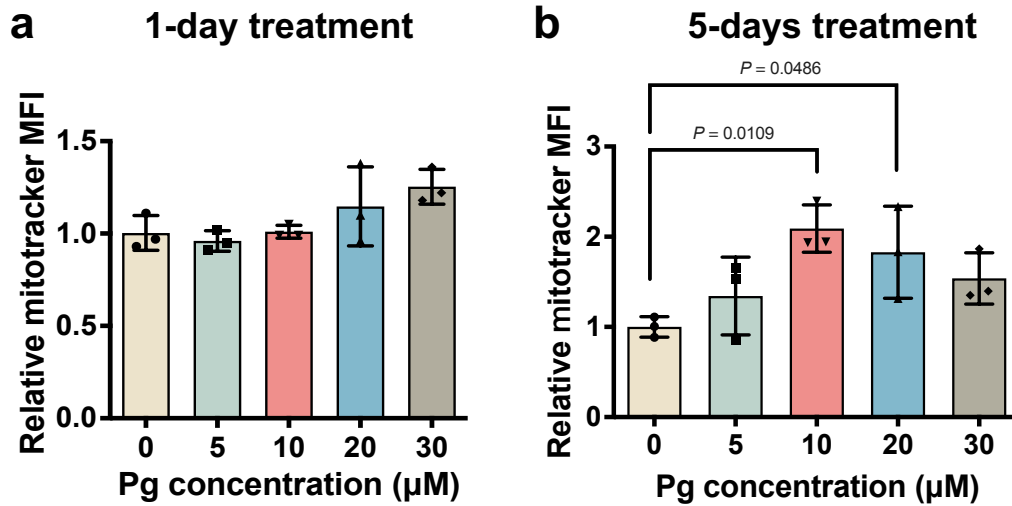

**Supplementary Fig. S1. Optimisation of using the treatment with Pg to increase the mitochondrial mass in hMSC.** (a) Mitochondrial mass indicated by the mean fluorescence index (MFI) of the mitochondrial tracker in hMSC after the treatment with Pg at different concentrations for 1 day ( $n = 3$  biologically independent cells). (b) Mitochondrial mass in hMSC after the treatment with Pg at different concentrations for five consecutive days ( $n = 3$  biologically independent cells). Data are presented as means  $\pm$  SD. Statistical significance was analysed using ordinary one-way analysis of variance (ANOVA).

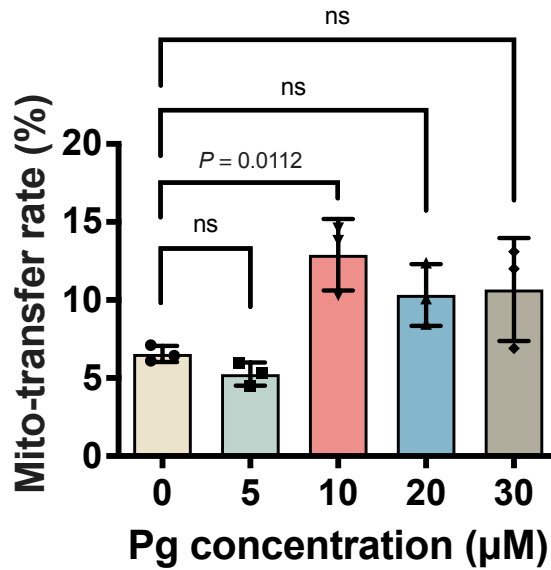

**Supplementary Fig. S2. Impacts of the treatment with Pg on mitochondrial transfer rate.** The mitochondrial transfer rate of hMSC after the treatment with Pg at different concentrations for 5 consecutive days ( $n = 3$  biologically independent cells). Data are presented as means  $\pm$  SD. Statistical significance was analysed using ordinary one-way ANOVA. ns, no significant difference.

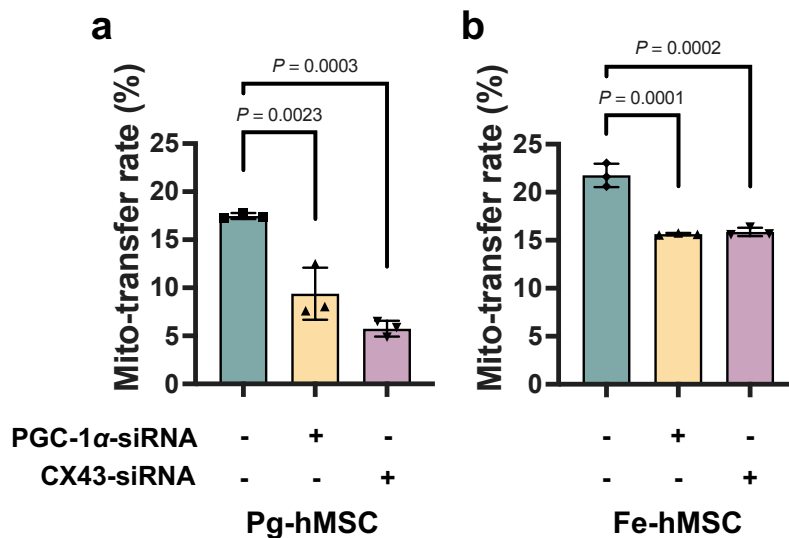

**Supplementary Fig. S3. Both the expression levels of PGC-1 $\alpha$  and Cx43 determine the efficiency of mitochondrial transfer rate.** (a) The mitochondrial transfer rate of Pg-hMSC with indicated treatments ( $n = 3$  biologically independent cells). (b) The mitochondrial transfer rate of Fe-hMSC with indicated treatments ( $n = 3$  biologically independent cells). Data are presented as means  $\pm$  SD. Statistical significance was analysed using ordinary one-way ANOVA.



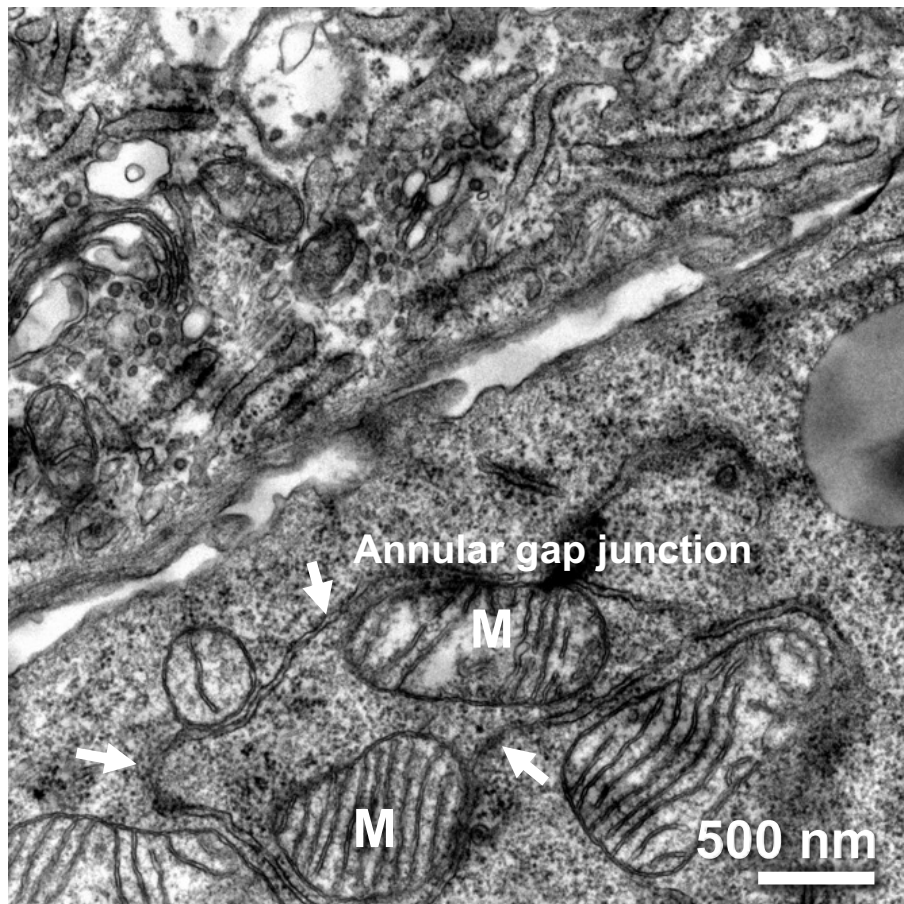

**Supplementary Fig. S4. TEM images of incorporated mitochondria in an annular gap junction.** A typical double-membrane annular gap junction structure with incorporated mitochondria is observed after the mitochondrial transfer. Scale bar, 500 nm.

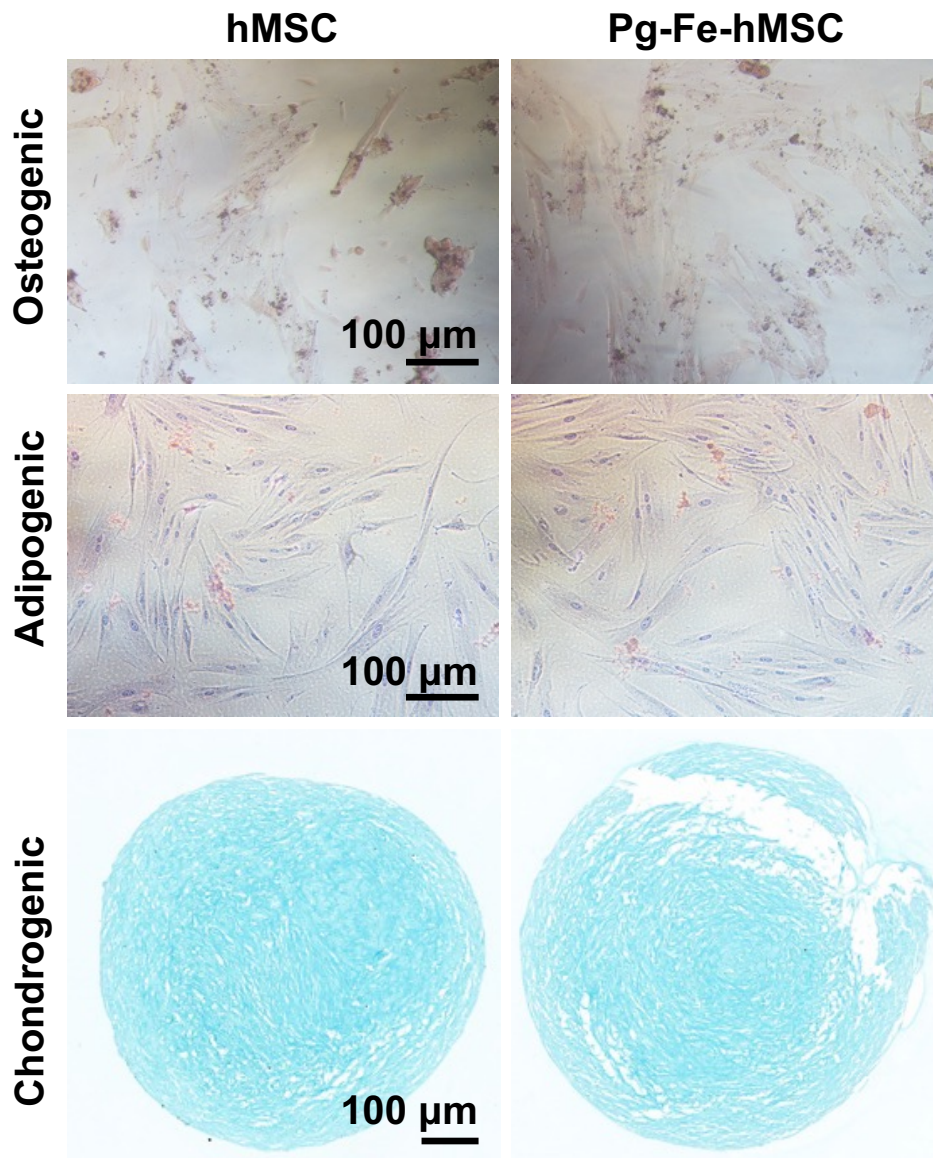

**Supplementary Fig. S5. Impacts of the engineering with Pg and IONPs on multiple differentiation potentials of hMSC.** Differentiations of Pg-Fe-hMSC to osteocytes, adipocytes and chondrocytes were not impacted. Scale bars, 100  $\mu\text{m}$ .

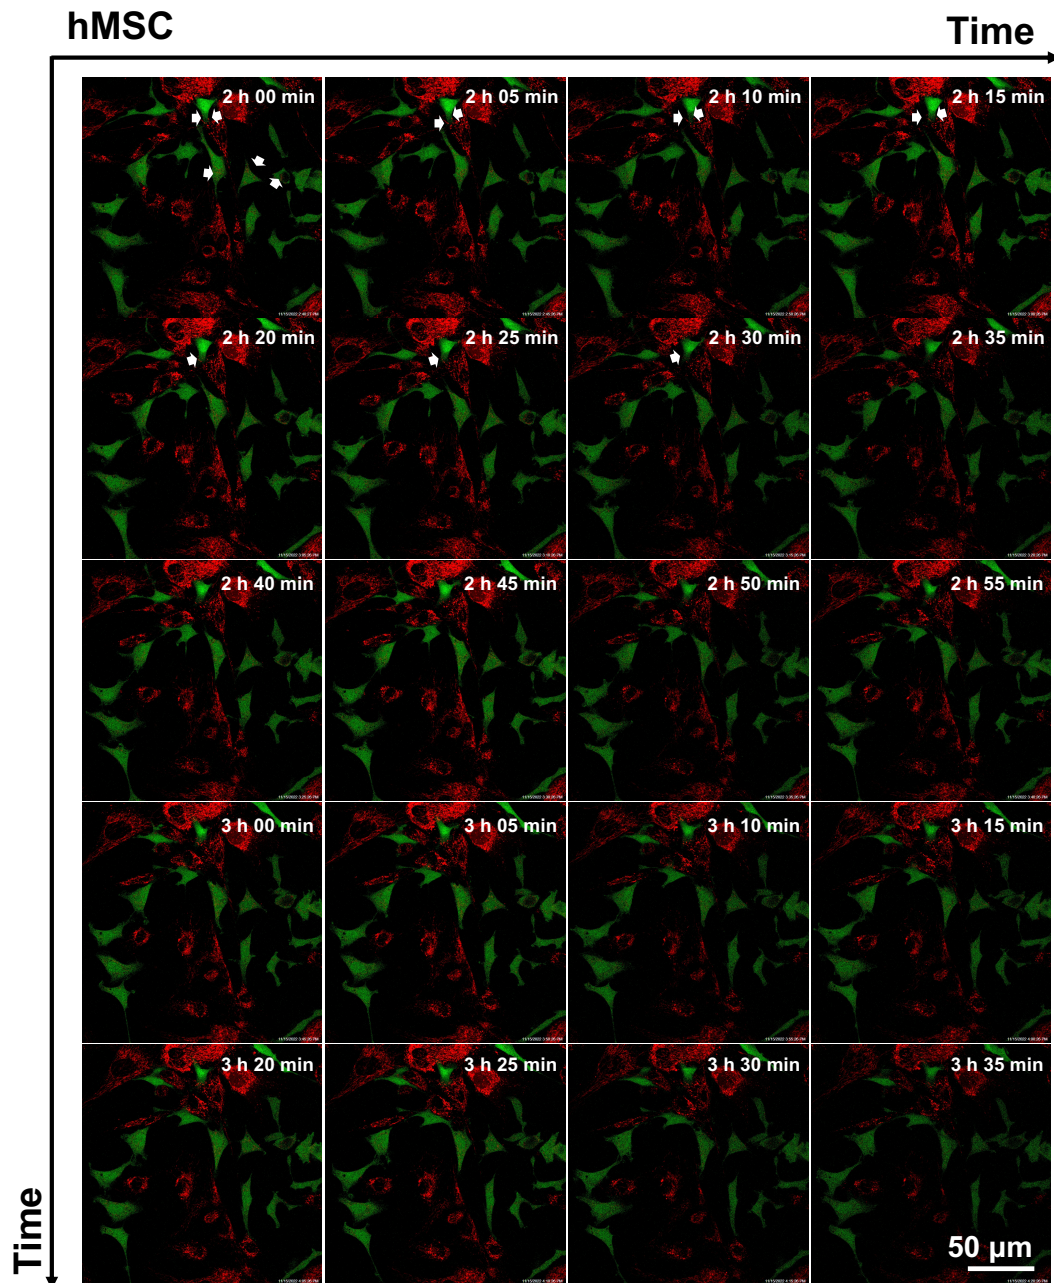

**Supplementary Fig. S6. Dynamic observations of the mitochondrial transfer process with hMSC.** Limited number of mitochondria was observed to be transferred from hMSC to BLM-TC-1 cells. Green: BLM-TC-1; red: mitochondria of hMSC; white arrows indicate the transferred mitochondria. Scale bar, 50  $\mu\text{m}$ .



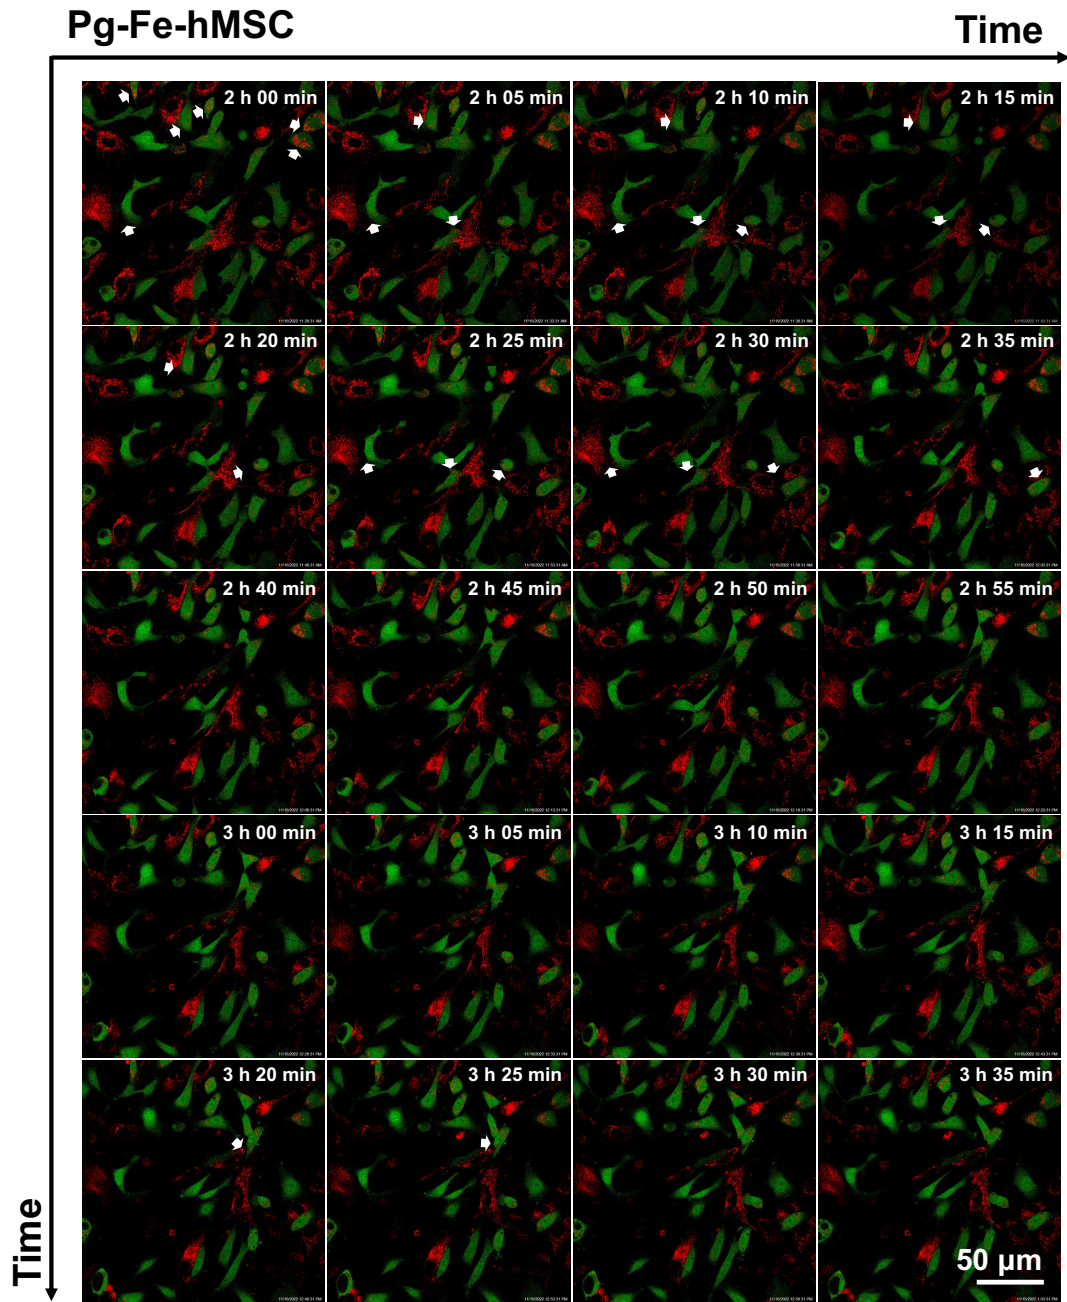

**Supplementary Fig. S7. Dynamic observations of the mitochondrial transfer process with Pg-Fe-hMSC.** Increased number of mitochondria was observed to be transferred from Pg-Fe-hMSC to BLM-TC-1 cells within a prolonged time period. Green: BLM-TC-1; red: mitochondria of Pg-Fe-hMSC; white arrows indicate the transferred mitochondria. Scale bar, 50  $\mu\text{m}$ .

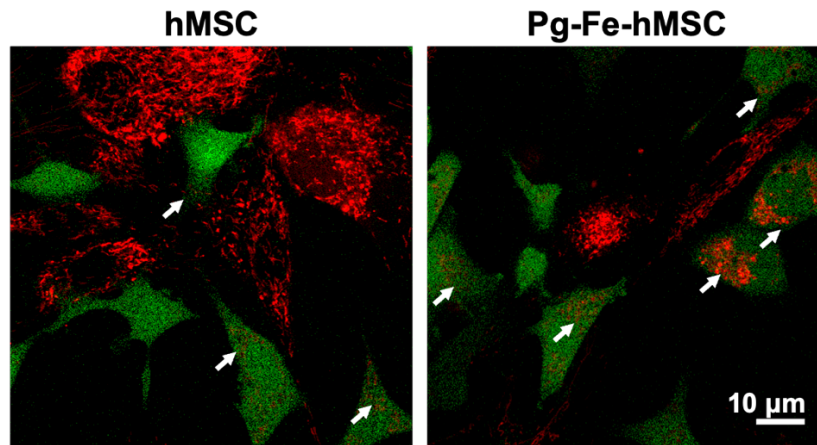

**Supplementary Fig. S8. Enlarged images of the above dynamic transfer process of mitochondria 2.5 h after the co-incubation.** Transferred mitochondria from hMSC or Pg-Fe-hMSC to BLM-TC-1 cells were indicated by white arrows. Pg-Fe-hMSC had a higher mitochondrial transfer rate than hMSC. Green: BLM-TC-1; red: mitochondria of hMSC; white arrows indicate the transferred mitochondria. Scale bar, 10  $\mu\text{m}$ .

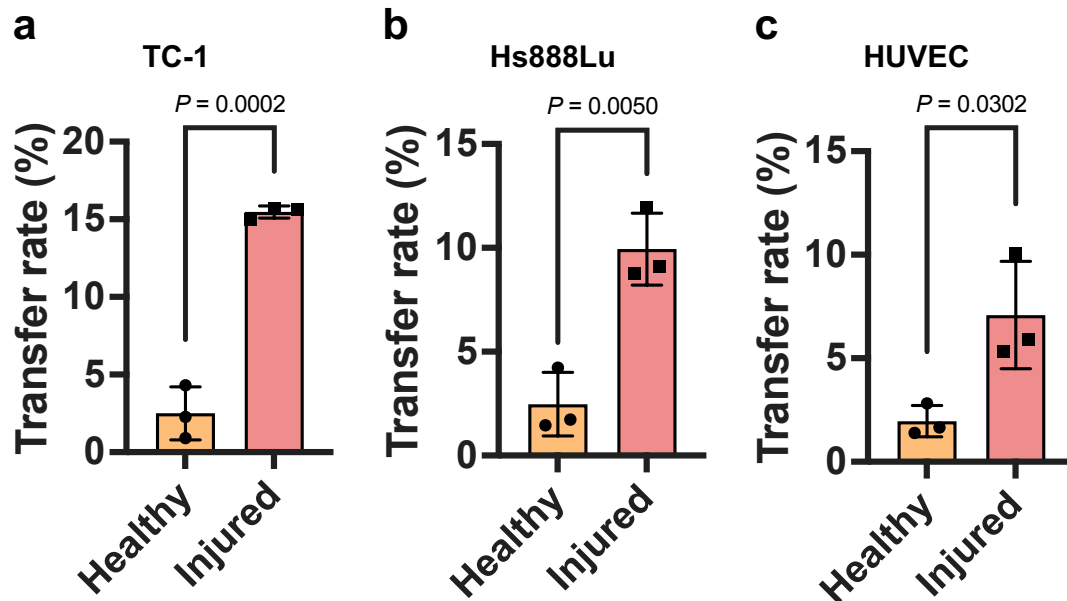

**Supplementary Fig. S9. Intercellular mitochondrial transfer from hMSCs to different receiving cells.** (a) Mitochondrial transfer rate from hMSCs to healthy and injured TC-1 cells ( $n = 3$  biologically independent cells). (b) Mitochondrial transfer rate from hMSCs to healthy and injured Hs888Lu cells ( $n = 3$  biologically independent cells). (c) Mitochondrial transfer rate from hMSCs to healthy and injured human umbilical vein endothelial cells (HUVECs) ( $n = 3$  biologically independent cells). Data are presented as means  $\pm$  SD. Statistical significance was analysed using two-sided Student's t-test.

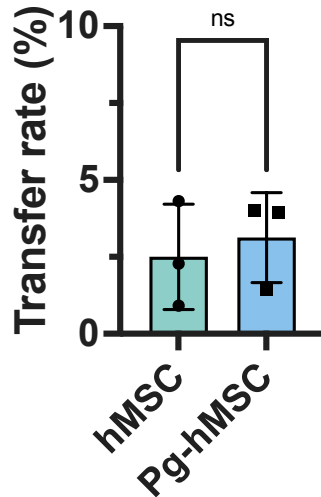

**Supplementary Fig. S10. Limited mitochondrial transfer rate between healthy cells.**

Mitochondrial transfer rate from hMSC or Pg-hMSC towards healthy TC-1 cell ( $n = 3$  biologically independent cells). Data are presented as means  $\pm$  SD. Statistical significance was analysed using two-sided Student's t-test. ns, no significant difference.

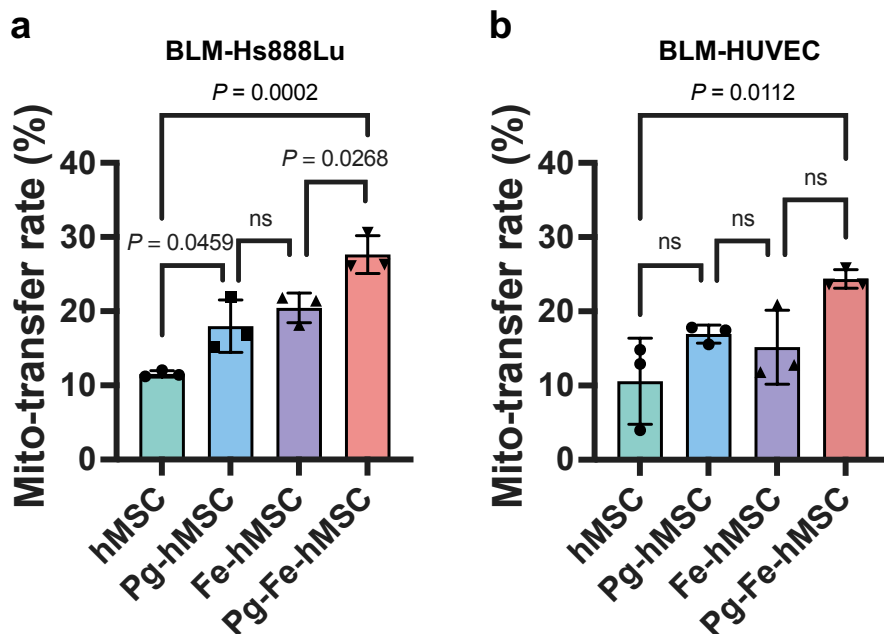

**Supplementary Fig. S11. Mitochondrial transfer rates of different engineered hMSCs.**

(a) Mitochondrial transfer rates of different engineered hMSCs to BLM-treated Hs888Lu cells ( $n = 3$  biologically independent cells). (b) Mitochondrial transfer rates of different engineered hMSCs to BLM-treated HUVECs ( $n = 3$  biologically independent cells). Data are presented as means  $\pm$  SD. Statistical significance was analysed using ordinary one-way ANOVA. ns, no significant difference.

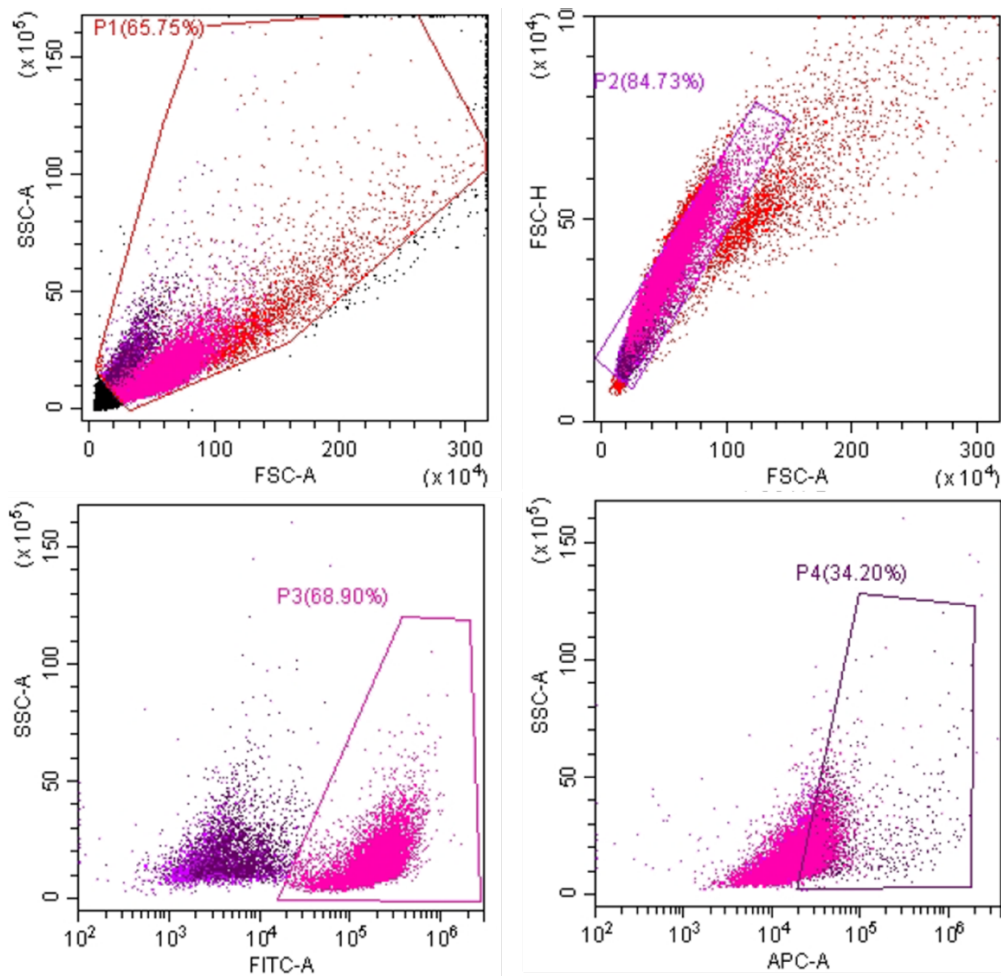

**Supplementary Fig. S12. Gating strategy by flow cytometers for quantitative determinations of mitochondrial transfer rates.**



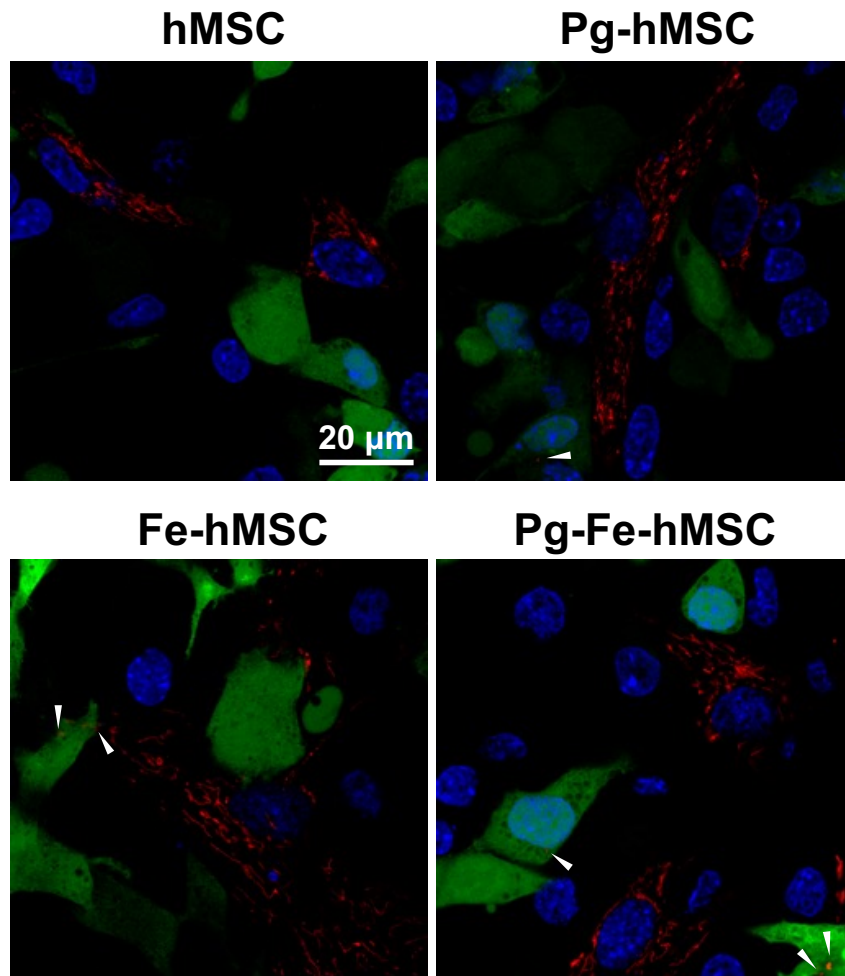

**Supplementary Fig. 13. Observations of long-term mitochondrial transfer from different engineered hMSCs to BLM-TC-1 cells.** Mitochondrial transfer at 96 h post the co-culture by using fluorescence microscopy. Blue: nuclei; green: BLM-TC-1; red: mitochondria of hMSC; white arrows indicate the transferred mitochondria. Scale bar, 20 μm.

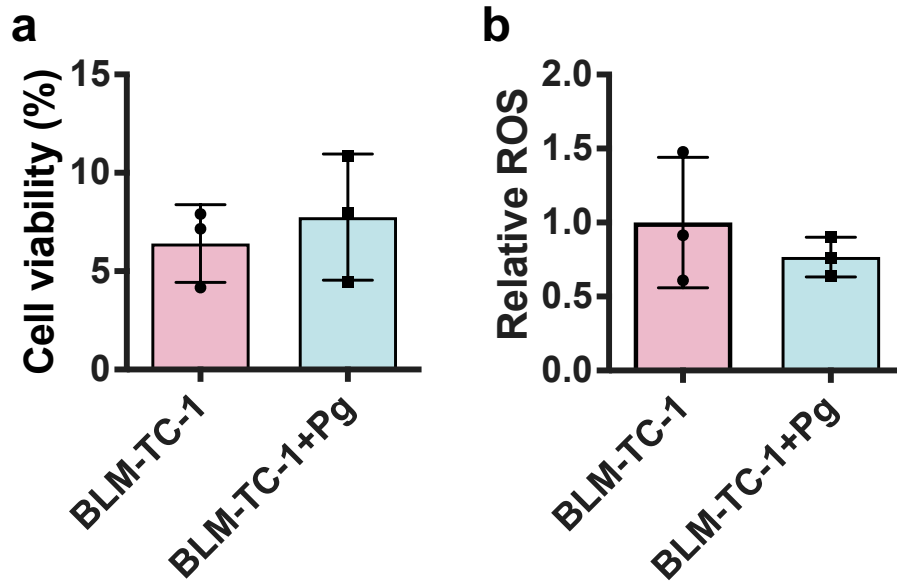

**Supplementary Fig. 14. Direct treatment of TC-1 cells with Pg has poor protection against the injury caused by BLM.** (a) Cell viability of BLM-TC-1 cells with and without Pg treatment (n = 3 biologically independent cells). (b) Relative ROS levels of BLM-TC-1 cells with and without Pg treatments (n = 3 biologically independent cells). Data are presented as means  $\pm$  SD. Statistical significance was analysed using two-sided Student's t-test.

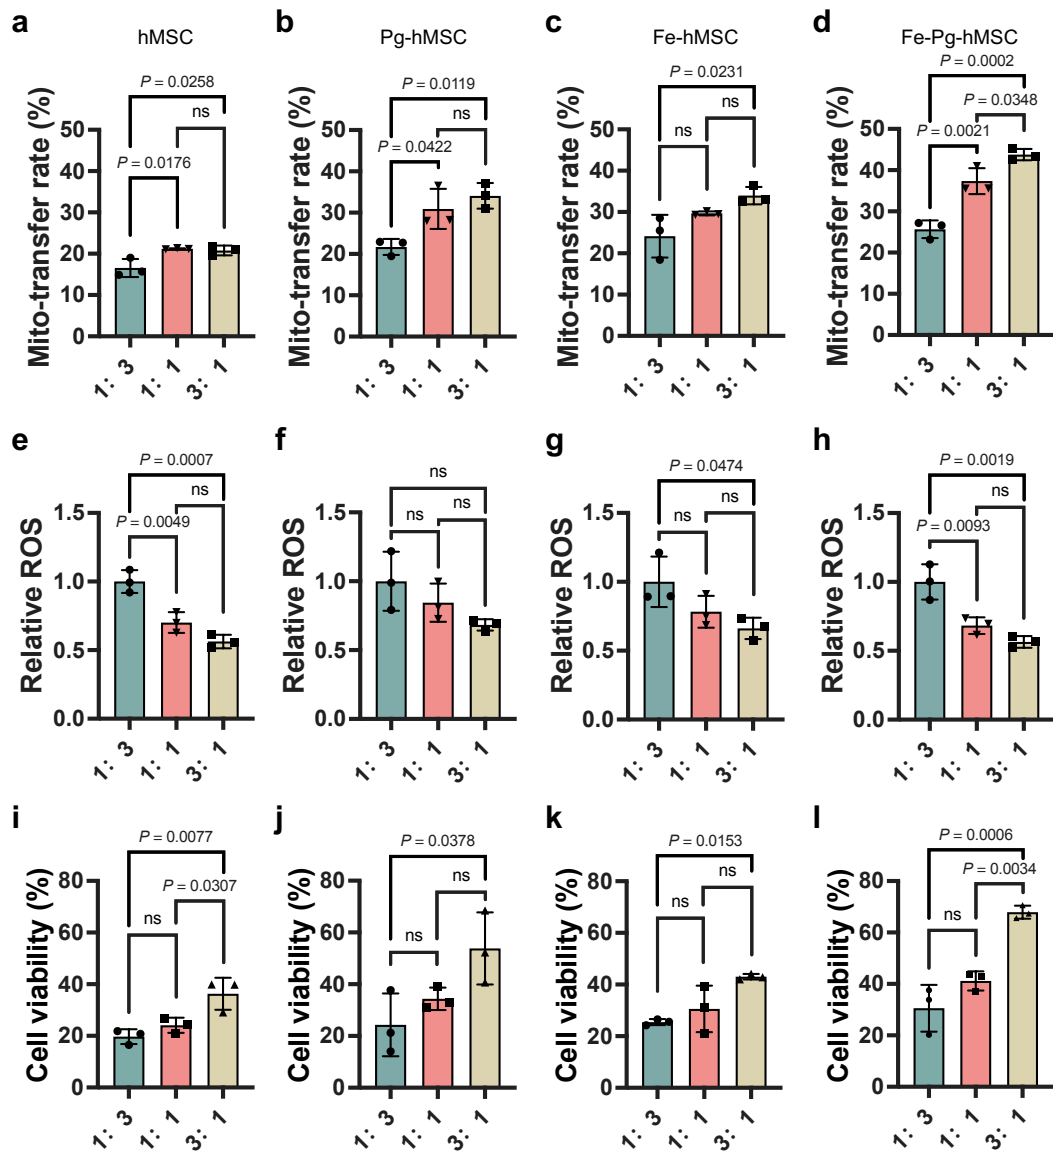

**Supplementary Fig. S15. Cell number ratios impact the mitochondrial transfer rates and associated therapeutic effects.** Mitochondrial transfer rates of (a) hMSC, (b) Pg-hMSC, (c) Fe-hMSC, and (d) Pg-Fe-hMSC at the indicated cell number ratios for co-culture (different engineered hMSCs:BLM-TC-1) ( $n = 3$  biologically independent cells for each). Relative ROS levels of BLM-TC-1 after co-culture with (e) hMSC, (f) Pg-hMSC, (g) Fe-hMSC, and (h) Pg-Fe-hMSC at the indicated cell number ratios ( $n = 3$  biologically independent cells for each). Cell viability of BLM-TC-1 after co-culture with (i) hMSC, (j) Pg-hMSC, (k) Fe-hMSC, and (l) Pg-Fe-hMSC at the indicated cell number ratios ( $n = 3$  biologically independent cells for each). Data are presented as means  $\pm$  SD. Statistical significance was analysed using ordinary one-way ANOVA.

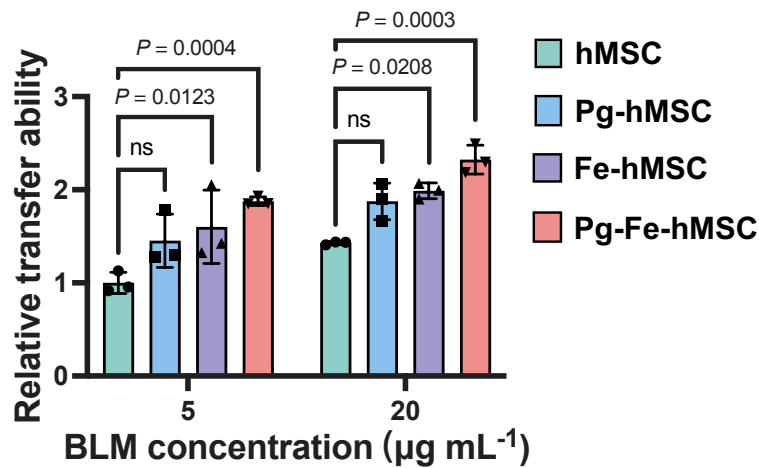

**Supplementary Fig. S16. The severity of injury of receiving cell affects the intercellular mitochondrial transfer capacity.** Comparisons of mitochondrial transfer capacity from different engineered hMSCs to injured TC-1 cells induced by the treatment of BLM at indicated concentrations. The mitochondrial transfer rate of hMSC was regarded as the base-line and was compared with the transfer rate of Pg-hMSC, Fe-hMSC, and Pg-Fe-hMSC (n = 3 biologically independent cells). Data are presented as means ± SD. Statistical significance was analysed using ordinary one-way ANOVA. ns, no significant difference.

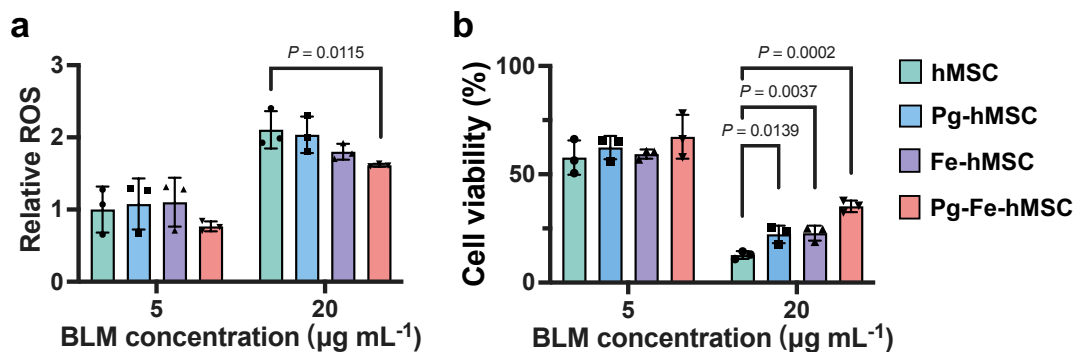

**Supplementary Fig. S17. Pg-Fe-hMSC demonstrates a more powerful therapeutic effect on TC-1 cell with more severe injury.** (a) Relative ROS level and (b) Cell viability of BLM-TC-1 cells post the treatments with different engineered hMSCs (n = 3 biologically independent cells for each). Data are presented as means ± SD. Statistical significance was analysed using ordinary one-way ANOVA.

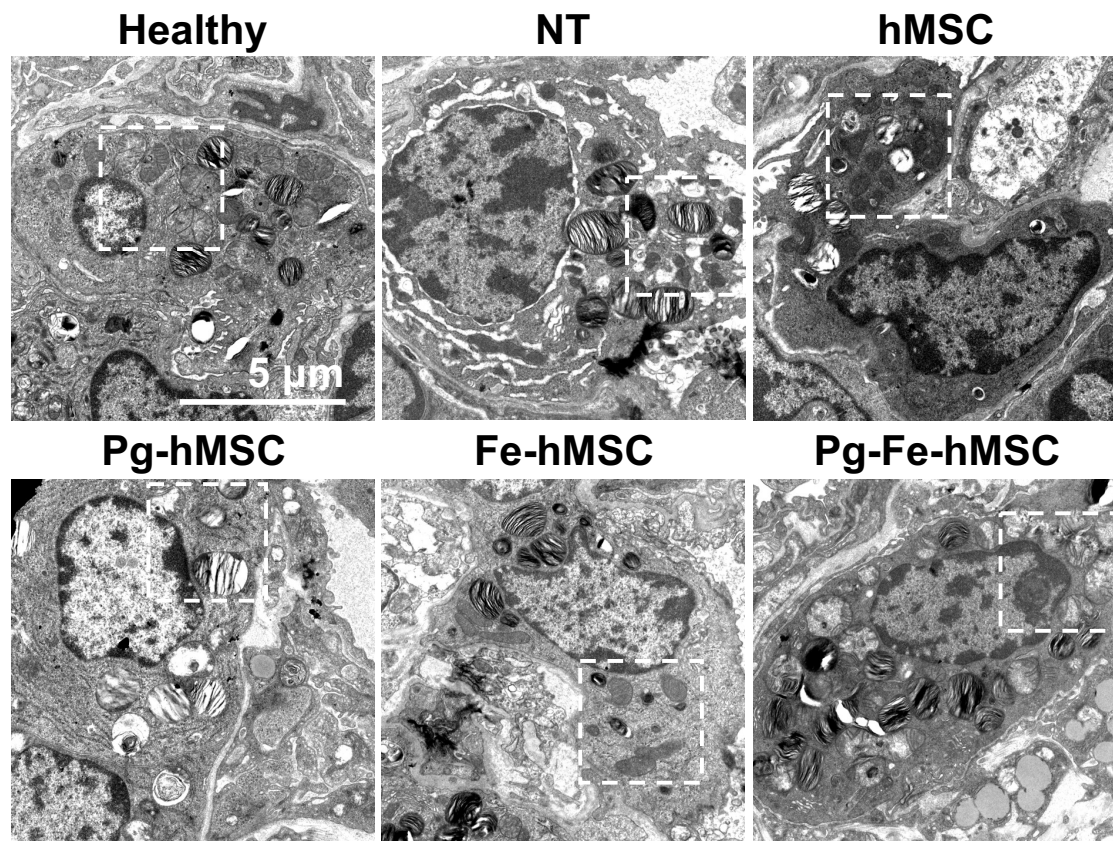

**Supplementary Fig. S18. Morphological observation of mitochondria in mice lung cells after the indicated treatments using TEM.** TEM images of Fig. 4g in a larger scale. White dotted squares indicate the enlarged area in Fig. 4g. Scale bar, 5 μm.

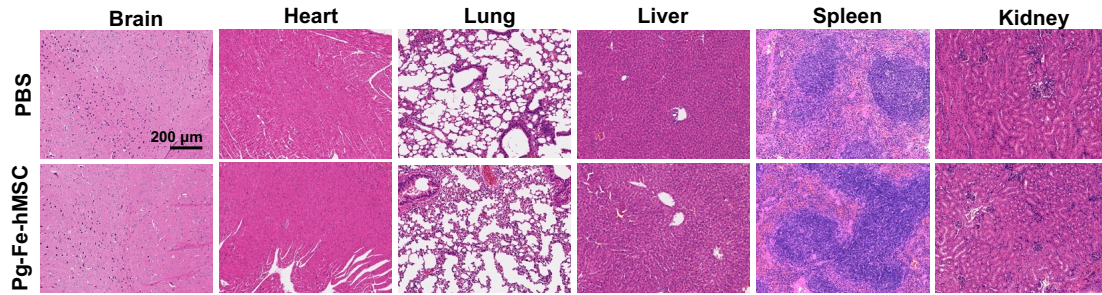

**Supplementary Fig. S19. H&E staining of major organs in C57BL/6 mice with and without Pg-Fe-hMSC treatment.** No obvious pathological changes were observed post Pg-Fe-hMSC treatment. Scale bar, 200  $\mu\text{m}$ .

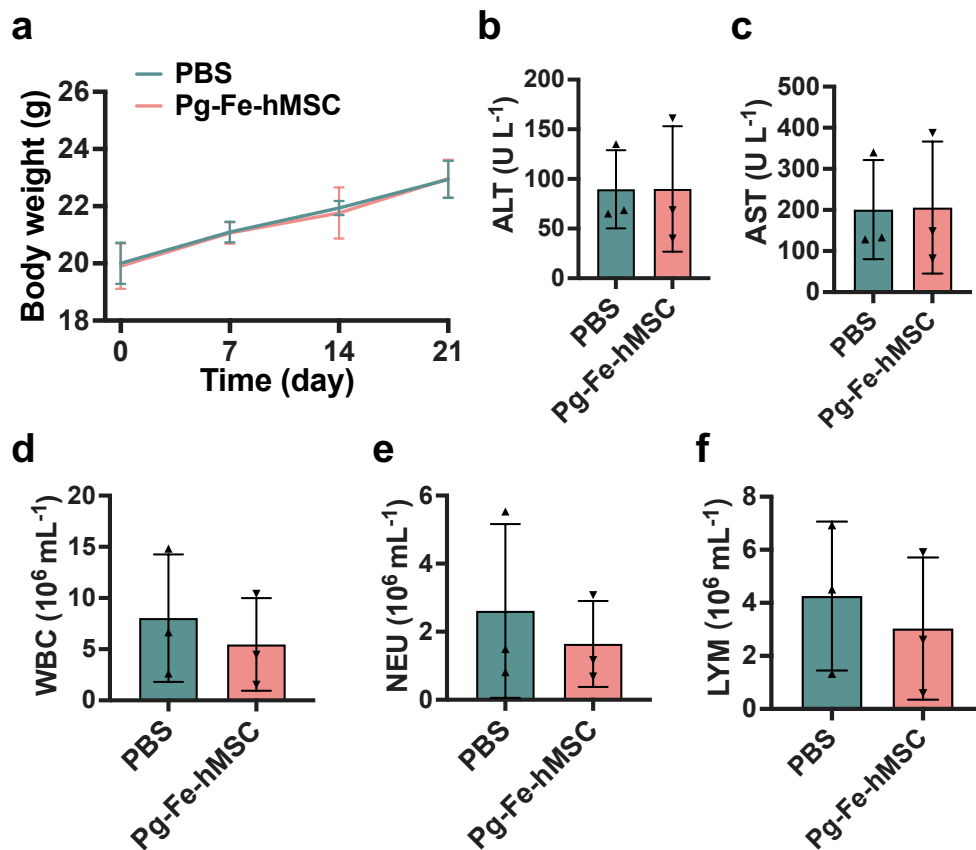

**Supplementary Fig. S20. Preliminary safety evaluations on the treatment using Pg-Fe-hMSC.** (a) Body weight changes of C57BL/6 mice with and without Pg-Fe-hMSC treatment (n = 3 biologically independent animals). (b) Alanine transaminase (ALT), (c) Aspartate transaminase (AST), (d) White blood cell (WBC), (e) Neutrophil (NEU), and (f) Lymphocyte (LYM) counts of mice with and without Pg-Fe-hMSC treatments (n = 3 biologically independent animals for each). Data are presented as means  $\pm$  SD. Statistical significance was analysed using Student's t-test.

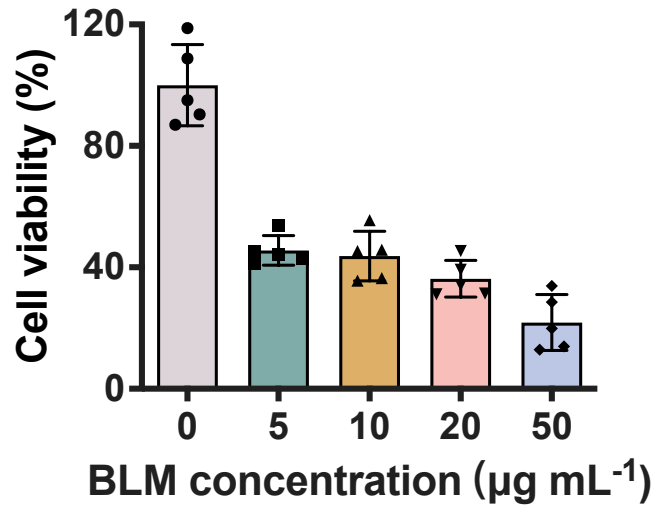

**Supplementary Fig. S21. Cell viability of primary human lung epithelial cells after the treatment with BLM at different concentrations.** Cell viability was evaluated 24 h after the treatment with BLM (n = 5 biologically independent cells). Data are presented as means  $\pm$  SD.

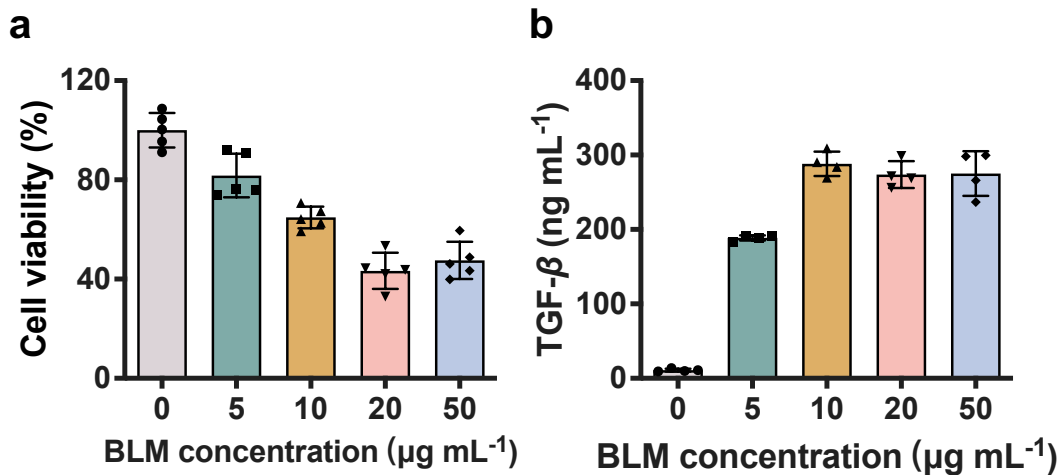

**Supplementary Fig. S22. Cell viability and TGF-β expression levels of 3D multicellular humanised lung model post the treatment with BLM at different concentrations.** (a) Cell viability of 3D humanised lung model after the treatment with BLM at the indicated concentrations (n = 5 biologically independent samples). (b) TGF-β levels of 3D humanised lung model after the treatment with BLM at the indicated concentrations (n = 4 biologically independent samples). Data are presented as means  $\pm$  SD.

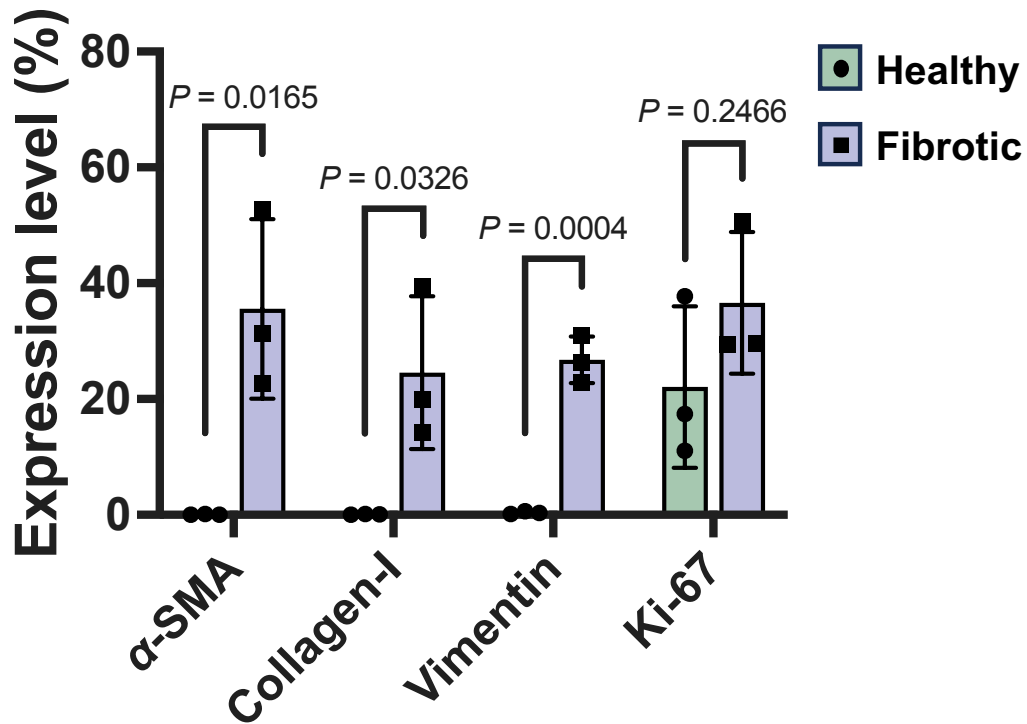

**Supplementary Fig. S23. Confirmation of the fibrotic 3D multicellular humanised lung model.** The expression levels of  $\alpha$ -SMA, vimentin, collagen-I, and Ki-67 after immunofluorescent staining were calculated according to the density of fluorescence signals using Image J software ( $n = 3$  biologically independent samples). Data are presented as means  $\pm$  SD. Statistical significance was analysed using ordinary one-way ANOVA.



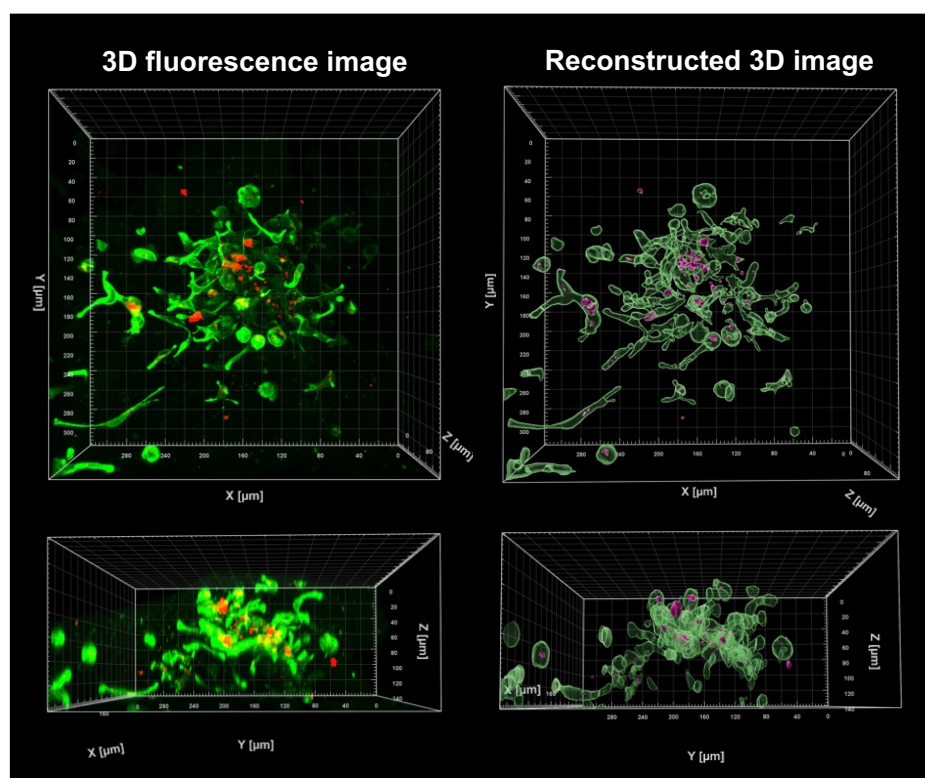

**Supplementary Fig. S24. Distribution of Pg-Fe-hMSC in the fibrotic 3D multicellular humanised lung spheroid.** Fluorescent signals of Pg-Fe-hMSC were observed inside the 3D fibrotic lung spheroid (left panel). The distribution images were then reconstructed according to the fluorescent signals and were demonstrated in the right panel. Green: human bronchial epithelial cells and lung fibroblasts; red: mitochondria of Pg-Fe-hMSC.

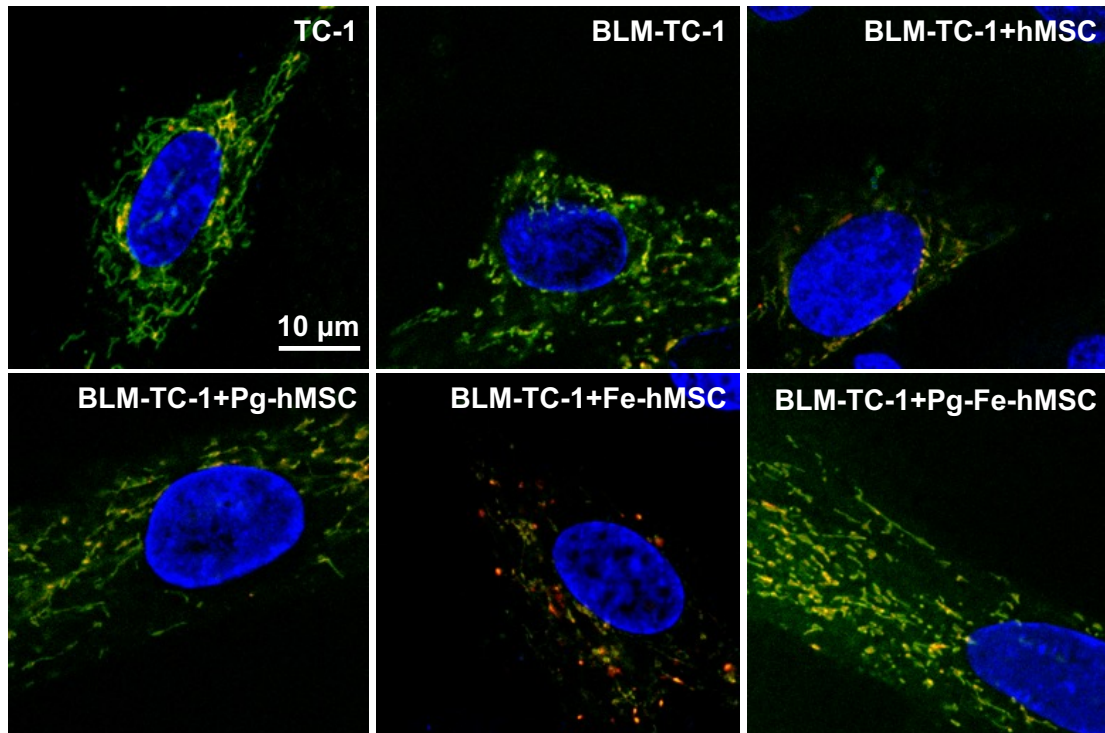

**Supplementary Fig. S25. Observation of the co-localisation of mitochondria and lysosomes.** Inhibited co-localisation of mitochondria and lysosomes in BLM-TC-1 cells was relieved after receiving exogenous mitochondria transferred from different engineered hMSCs, especially from Pg-Fe-hMSC. Blue: cell nuclei; green: mitochondria; red: lysosomes. Scale bar, 10  $\mu$ m.

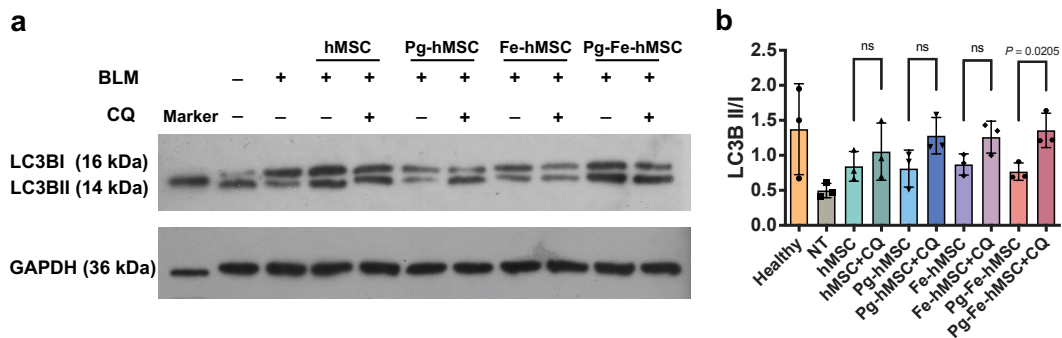

**Supplementary Fig. S26. Pg-Fe-hMSC promotes the autophagy of BLM-TC-1 cell.** (a) Representative Western blot images of LC3B expression level by TC-1 cells with or without chloroquine (CQ) treatments. (b) Semiquantitative determination of the Western blot analysis ( $n = 3$  biologically independent samples). Data are presented as means  $\pm$  SD. Statistical significance was analysed using ordinary one-way ANOVA. ns, no significant difference.

**Supplementary Table S1.** STR authentication of human umbilical vein endothelial cells (HUVEC)

| Maker   | Sample information |         |         |         | Cell Bank information |         |
|---------|--------------------|---------|---------|---------|-----------------------|---------|
|         | Allele1            | Allele2 | Allele3 | Allele4 | Allele1               | Allele2 |
| D5S818  | 11                 | 12      |         |         | 11                    | 12      |
| D13S317 | 9                  | 11      |         |         | 9                     | 11      |
| D7S820  | 8                  | 12      |         |         | 8                     | 12      |
| D16S539 | 11                 | 12      |         |         | 11                    | 12      |
| VWA     | 16                 | 16      |         |         | 16                    | 16      |
| TH01    | 6                  | 9.3     |         |         | 6                     | 9.3     |
| AMEL    | X                  | X       |         |         | X                     | X       |
| TPOX    | 8                  | 11      |         |         | 8                     | 11      |
| CSF1PO  | 11                 | 12      |         |         | 11                    | 12      |
| D12S391 | 17                 | 17      |         |         |                       |         |
| FGA     | 21                 | 23      |         |         |                       |         |
| D2S1338 | 18                 | 22      |         |         |                       |         |
| D21S11  | 28                 | 31      |         |         |                       |         |
| D18S51  | 13                 | 17      |         |         |                       |         |
| D8S1179 | 15                 | 17      |         |         |                       |         |
| D3S1358 | 16                 | 16      |         |         |                       |         |
| D6S1043 | 12                 | 18      |         |         |                       |         |
| PENTAE  | 7                  | 13      |         |         |                       |         |
| D19S433 | 12                 | 13      |         |         |                       |         |
| PENTAD  | 12                 | 13      |         |         |                       |         |
| D1S1656 | 12                 | 17.3    |         |         |                       |         |

**Supplementary Table S2.** STR authentication of BEAS-2B cells

| Maker   | Sample information |         |         |         | Cell Bank information |         |
|---------|--------------------|---------|---------|---------|-----------------------|---------|
|         | Allele1            | Allele2 | Allele3 | Allele4 | Allele1               | Allele2 |
| D5S818  | 12                 | 13      |         |         | 12                    | 13      |
| D13S317 | 13                 | 13      |         |         | 13                    | 13      |
| D7S820  | 10                 | 13      |         |         | 10                    | 13      |
| D16S539 | 12                 | 12      |         |         | 12                    | 12      |
| VWA     | 17                 | 18      |         |         | 17                    | 18      |
| TH01    | 7                  | 9.3     |         |         | 7                     | 9.3     |
| AMEL    | X                  | Y       |         |         | X                     | Y       |
| TPOX    | 6                  | 11      |         |         | 6                     | 11      |
| CSF1PO  | 9                  | 12      |         |         | 9                     | 12      |
| D12S391 | 17                 | 18      |         |         |                       |         |
| FGA     | 20                 | 24      |         |         |                       |         |
| D2S1338 | 22                 | 23      |         |         |                       |         |
| D21S11  | 28                 | 30      |         |         |                       |         |
| D18S51  | 18                 | 19      |         |         |                       |         |
| D8S1179 | 13                 | 15      |         |         |                       |         |
| D3S1358 | 15                 | 17      |         |         |                       |         |
| D6S1043 | 12                 | 18      |         |         |                       |         |
| PENTAE  | 5                  | 8       |         |         |                       |         |
| D19S433 | 13.2               | 15.2    |         |         |                       |         |
| PENTAD  | 3                  | 13      |         |         |                       |         |
| D1S1656 | 14                 | 15      |         |         |                       |         |

**Supplementary Table S3.** STR authentication of Hs888Lu cells

| Maker   | Sample information |         |         |         | Cell Bank information |         |
|---------|--------------------|---------|---------|---------|-----------------------|---------|
|         | Allele1            | Allele2 | Allele3 | Allele4 | Allele1               | Allele2 |
| D5S818  | 12                 | 13      |         |         | 13                    | 13      |
| D13S317 | 11                 | 14      |         |         | 11                    | 14      |
| D7S820  | 7                  | 11      |         |         | 7                     | 11      |
| D16S539 | 8                  | 12      |         |         | 8                     | 12      |
| VWA     |                    |         |         |         | 15                    | 18      |
| TH01    | 9.3                | 9.3     |         |         | 10                    | 9.3     |
| AMEL    | X                  | Y       |         |         | X                     | Y       |
| TPOX    | 8                  | 11      |         |         | 8                     | 11      |
| CSF1PO  | 10                 | 11      |         |         | 10                    | 11      |
| D12S391 | 19                 | 20      |         |         |                       |         |
| FGA     | 21                 | 23      |         |         |                       |         |
| D2S1338 | 17                 | 18      | 19      | 20      |                       |         |
| D21S11  | 28                 | 29      |         |         |                       |         |
| D18S51  | 13                 | 16      |         |         |                       |         |
| D8S1179 |                    |         |         |         |                       |         |
| D3S1358 | 16                 | 17      | 18      |         |                       |         |
| D6S1043 | 12                 | 19      |         |         |                       |         |
| PENTAE  | 13                 | 19      |         |         |                       |         |
| D19S433 | 13                 | 14      |         |         |                       |         |
| PENTAD  | 13                 | 13      |         |         |                       |         |

**Supplementary Table S4.** Primer sequences for PCR

| Gene                 | Genbank<br>Accession      | Primer Sequences (5' to 3')                          |
|----------------------|---------------------------|------------------------------------------------------|
| Human GAPDH          | NM_002046.5               | CCATGACAACCTTTGGTATCGTGGA<br>GGCCATCACGCCACAGTTTC    |
| Mouse GAPDH          | GU214026.1                | GAAGGTCGGTGTGAACGGATTTG<br>CATGTAGACCATGTAGTTGAGGTCA |
| Human TFAM           | NM_003201.3               | GCTCCCCCTTCAGTTTTGTG<br>CTCCAACGCTGGGCAATTC          |
| Human PGC-1 $\alpha$ | NM_001330751.2            | GTCCTCACAGAGACACTAGACA<br>CTCCATCTGTCAGCGCATCAA      |
| Mouse Collagen-I     | NM_007743.2               | CCTTCTGGACCCGTTGGCAAAGAT<br>GGCTACCCTGAGAACCACGAACA  |
| Human NRF1           | NM_005011.5               | TGTATCTCACCCCTCCAAACCTAACCG<br>CACCACATTCTCCAAAGG    |
| Mouse Tomm5          | NM_001099675.1            | GGAGGAGATGAAGCGGAAGAT<br>AGGGCCACGTAGATGAGGAA        |
| Mouse Tomm6          | NM_001164729.1            | GCCTCAGAGGTTCCAGACAA<br>CCTCCGGAAGTCGTTTCGAT         |
| Mouse Tomm70         | NM_138599.5               | GAGCAGAGCATGCTGTTAGCT<br>GCATCAGAGGTTACGGTTCT        |
| Mouse Tomm5          | NM_001099675.1            | GGAGGAGATGAAGCGGAAGAT<br>AGGGCCACGTAGATGAGGAA        |
| Mouse Tomm6          | NM_001164729.1            | GCCTCAGAGGTTCCAGACAA<br>CCTCCGGAAGTCGTTTCGAT         |
| Mouse ND1            | NC_005089.1:275<br>1-3707 | CAGCCTGACCCATAGCCATA<br>CCGGCTGCGTATTCTACGTT         |
| Mouse ND3            | NC_005089.1:945<br>9-9806 | GCGGATTCGACCCTACAAG<br>GCTCATGGTAGTGGAAGTAGAAGA      |
| Mouse Cox1           | NC_005089.1:532<br>8-6872 | CCCCAGCCATAACACAGTATC<br>CACTGGTAGTGATAATAGGAGCAGT   |
| Mouse Cox2           | NM_011198.4               | GGCAGGAAGTCTTTGGTCTGGT<br>CTGGTTTGGAAATAGTTGCTCATCAC |

**Supplementary Table S5.** Antibody information

| Antibody                     | Source        | Cat. no.   | Dilution |
|------------------------------|---------------|------------|----------|
| Mouse anti-CD31 FITC         | Biolegend     | 102405     | 1:200    |
| Mouse anti-CD45 PerCP/Cy5.5  | Biolegend     | 103132     | 1:200    |
| Mouse anti-CD326 PE          | Biolegend     | 118205     | 1:200    |
| Goat anti-rabbit IgG (H+L)   | Boster        | BA1105     | 1:100    |
| Secondary Antibody FITC      |               |            |          |
| Rabbit anti-EpCAM            | Affinity      | DF6311     | 1:500    |
| Rabbit anti-Ki67             | Boster        | PB9026     | 1:200    |
| Rabbit anti-VIM              | Boster        | BM4029     | 1:100    |
| Rabbit anti- $\alpha$ -SMA   | Boster        | BM3902     | 1:100    |
| Rabbit anti-collagen, type 1 | Proteintech   | 14695-1-AP | 1:500    |
| Rabbit anti-LC3B             | CST           | 43566      | 1:1000   |
| Rabbit anti-GAPDH            | Abcam         | Ab181602   | 1:10000  |
| Goat anti-rabbit IgG (H+L)   | Thermo Pierce | 31210      | 1:5000   |
| Goat anti-mouse IgG (H+L)    | Thermo Pierce | 31431      | 1:5000   |
