# Supplementary material for: Efficient intervention for pulmonary fibrosis via mitochondrial transfer promoted by mitochondrial biogenesis
Source: PubMed Central journal article supplement (PMC10507082; doi:10.1038/s41467-023-41529-7), 2023-09-18
Supplement: 41467_2023_41529_MOESM3_ESM.pdf [file 41467_2023_41529_MOESM3_ESM.pdf]

## **Description of Additional Supplementary Files Document**

### **Supplementary Movie S1.**

Dynamic observations of the mitochondrial transfer process from hMSC to BLM-TC-1 cells.

### **Supplementary Movie S2.**

Dynamic observations of the mitochondrial transfer process from Pg-Fe-hMSC to BLM-TC1 cells.
